# Supplementary material
Source: PubMed Central journal article supplement (PMC2394871)

**Table S1:** Primers used in this study.

## A. Sequencing primers.

| Gene                           | Primer name          | Sequence                            |
|--------------------------------|----------------------|-------------------------------------|
| Ribosomal protein S7           | S7-f                 | 5'-agggtgtgaagaacggcaagcagg-3'      |
|                                | S7-r                 | 5'-gtcttctctcggctctcgatgtggg-3'     |
| Ribosomal protein S12          | S12-f                | 5'-attcgccacagaaaccggagaag-3'       |
|                                | S12-r                | 5'-agaggagaaccgtagaccgggtcga-3'     |
| Ribosomal protein L11          | rplKL-f              | 5'-ctatacccggttatcggtgtcgggatgcc-3' |
|                                | rplKL-r              | 5'-gaagatcacctactcttcaccgtcactc-3'  |
|                                | rplK-r               | 5'-tcgaacttgctcgtggaggctcc-3'       |
| Ribosomal protein L14          | L14-f                | 5'-gagtcgttcaccaaggtgaccg-3'        |
|                                | L14-r                | 5'-cctgcttgccttgccttaccg-3'         |
| Ribosomal protein L15          | L15-f                | 5'-atcaacacgcaggtcgtcaagg-3'        |
|                                | L15-r                | 5'-ggatcgtcatgtcatcgacacg-3'        |
| Elongation factor G            | fusA-f               | 5'-cacaagatggccgagtcacaacaag-3'     |
|                                | fusA-seq1            | 5'-tggacctggtccgcatgaagg-3'         |
|                                | fusA-seq2            | 5'-ctcgacgtcaggccatcgag-3'          |
|                                | fusA-seq3            | 5'- acgctgtccgacgacaagagc-3'        |
|                                | fusA-seq4            | 5'-ctacaccacaagaagcagac-3'          |
|                                | fusA-r               | 5'-tcaagcctaaagcgtgagaacggggtc-3'   |
| RNA polymerase $\beta$ subunit | rpoB-II <sub>f</sub> | 5'-ggccgctacaaggtgaacaagaag-3'      |
|                                | rpoB-II <sub>r</sub> | 5'-ccgatcagaccgatgttcggg-3'         |

**Table S1:** Primers used in this study (continued).

B. RT-PCR and RT-qPCR Primers.

| Gene  | Primer name | Sequence                        |
|-------|-------------|---------------------------------|
| ORF-4 | ORF4-f      | 5'-accgatgcgggatgtgtaattccg-3'  |
|       | ORF4-r      | 5'-gtgcgcgatattgcttcgagcac-3'   |
| RelA  | relA-f      | 5'-cgcctgcacaacatgcgcacatgcg-3' |
|       | relA-r      | 5'-ggtctccttctgccagtcgagcagc-3' |
| HrdB  | hrdB-f      | 5'-gattgggcgtaacgctcttg-3'      |
|       | hrdB-r      | 5'-ccatgacagagacggactcg-3'      |

**Figure S1:** Intracellular ppGpp levels of the wild-type 1147 (■) and octuple mutant C8 (□) strains grown in liquid GYM medium. Strains were inoculated into liquid GYM medium and incubated on a rotary shaker (200 rpm) at 30 °C, and ppGpp was extracted with 1 M formic acid from cells harvested at the indicated time points. The measurement of ppGpp was repeated at least twice with similar results.

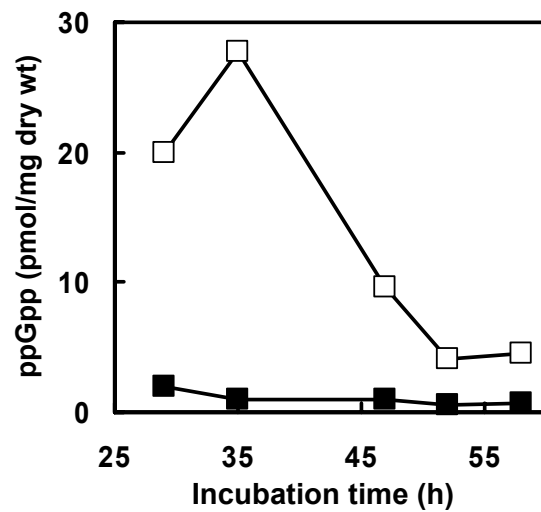

Supplement: supp_74_9_2834__1.pdf [file supp_74_9_2834__1.pdf]
